# Supplementary material
Source: publisher site journal article supplement (https://www.dovepress.com/article/566542)
Supplement: Supplementary file 1 [file 566542%20Supplementary%20Materials.pdf]

Supplementary Table 1. Key diagnostic features of specific immune-related adverse events.

| Organ System / irAE                         | Key Clinical Features                                     | Diagnostic Evaluation                                        | Key Differential Diagnoses                                       |
|---------------------------------------------|-----------------------------------------------------------|--------------------------------------------------------------|------------------------------------------------------------------|
| Endocrine: Hypothyroidism                   | Fatigue, weight gain, cold intolerance, constipation      | Elevated TSH, decreased free T4                              | None specified                                                   |
| Endocrine: Hyperthyroidism                  | Palpitations, sweating, weight loss, increased appetite   | Elevated free T3/T4, suppressed TSH                          | None specified                                                   |
| Endocrine: Hypophysitis                     | Persistent headache, visual disturbances                  | Pituitary swelling on MRI; low ACTH/cortisol                 | Brain metastases, leptomeningeal disease, stroke                 |
| Endocrine: Immune-related diabetes mellitus | New-onset polyuria, polydipsia, weight loss, ketoacidosis | Elevated blood glucose, HbA1c                                | Other causes of ketoacidosis (e.g., type 1 diabetes)             |
| Cardiac: Myocarditis                        | Chest pain, heart failure symptoms, palpitations, dyspnea | Elevated troponin/CK-MB; ECG abnormalities; Echocardiography | Acute coronary syndrome, pulmonary embolism, disease progression |
| Dermatologic: Maculopapular Rash            | Maculopapular rash, pruritus, mucosal involvement         | Clinical skin examination                                    | Allergic reactions, other drug eruptions, infection              |
| Pulmonary: Pneumonitis                      | Dyspnea, cough, chest pain; 1/3 patients are asymptomatic | CT showing GGO or infiltrates                                | Pulmonary infection, disease progression, alveolar hemorrhage    |
| Gastrointestinal: Colitis                   | Diarrhea, abdominal pain, bloody/mucoid stools            | Endoscopy (mucosal erythema/erosions/ulcers)                 | Infectious colitis                                               |

---

|                                               |                                                                    |                                                               |                                                                 |
|-----------------------------------------------|--------------------------------------------------------------------|---------------------------------------------------------------|-----------------------------------------------------------------|
| Musculoskeletal: Myositis                     | Proximal muscle weakness, pain, myalgia                            | Elevated CK/aldolase; EMG/MRI/biopsy if needed                | Other myopathies, infectious myositis                           |
| Hepatic: Hepatitis                            | Often asymptomatic; non-specific fatigue, fever                    | Elevated ALT/AST, with or without elevated bilirubin          | Other causes of liver injury (metastases, other drugs)          |
| Neurological: Aseptic Meningitis / Neuropathy | Variable CNS/PNS symptoms (e.g., headache, weakness, sensory loss) | Neurological exam; Brain/spine MRI; CSF analysis              | Disease progression, metabolic deficiencies, infection          |
| Hematological: Cytopenias                     | Fatigue, pallor, bruising, bleeding                                | Anemia, thrombocytopenia; positive Coombs test (if hemolytic) | Other causes of cytopenias                                      |
| Pancreatic: Pancreatitis                      | Abdominal pain, nausea, vomiting (often asymptomatic)              | Elevated amylase/lipase; CT findings                          | Gallstones, metastases, hypertriglyceridemia, other drug causes |

---

Supplementary Table 2. Incidence of irAEs across patient subgroups.

| Characteristics   | Subgroup                           | irAEs, n <sup>†</sup> / N <sup>‡</sup> (%) |
|-------------------|------------------------------------|--------------------------------------------|
| Tumor Type        |                                    |                                            |
|                   | Cervical Cancer                    | 106/415 (25.5)                             |
|                   | Vaginal Cancer                     | 3/15 (20)                                  |
|                   | Ovarian Cancer                     | 14/75 (18.7)                               |
|                   | Vulvar Cancer                      | 3/18 (16.7)                                |
|                   | Uterine Malignancy                 | 9/81 (11.1)                                |
|                   | Gestational Trophoblastic Neoplasm | 1/22 (4.5)                                 |
| Treatment Stage   |                                    |                                            |
|                   | Initial treatment                  | 78/302 (25.8)                              |
|                   | Recurrent disease                  | 58/324 (17.9)                              |
| Treatment regimen |                                    |                                            |
|                   | ICIs Monotherapy                   | 22/41 (53.7)                               |
|                   | ICI + Chemotherapy                 | 96/506 (19.0)                              |
|                   | ICI + Radiotherapy                 | 25/153 (16.3)                              |
|                   | ICI + Targeted Therapy             | 25/180 (13.9)                              |
| ICI Class         |                                    |                                            |
|                   | Anti-PD-1                          | 98/530 (18.5)                              |
|                   | Anti-PD-L1                         | 6/15 (40.0)                                |
|                   | Anti-PD-1 + Anti-CTLA-4            | 32/81 (39.5)                               |

**Note:** † n, number of patients with irAEs; ‡ N, total patients in the subgroup.

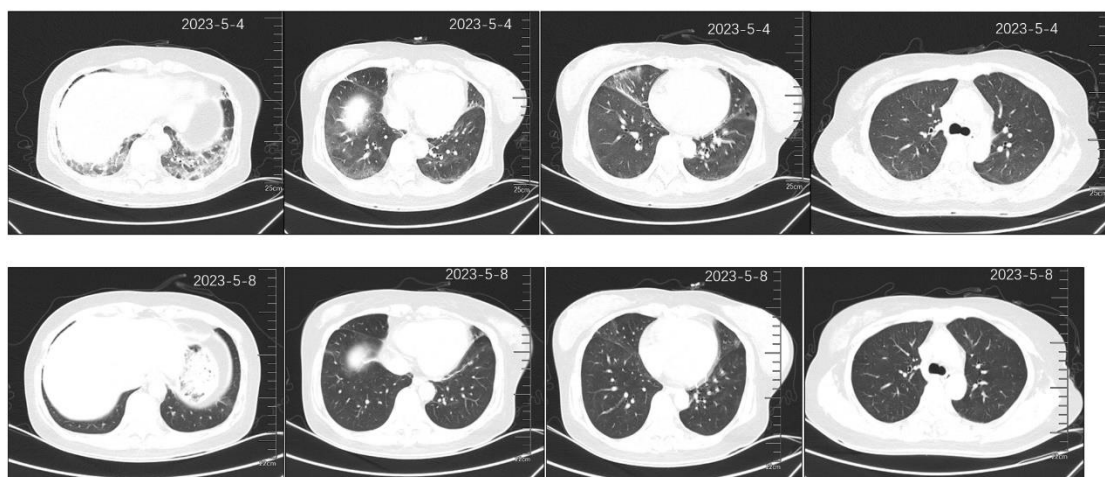

Supplementary Figure 1. Pulmonary CT Imaging Changes in a Patient with Pneumonitis as an irAE During Treatment.

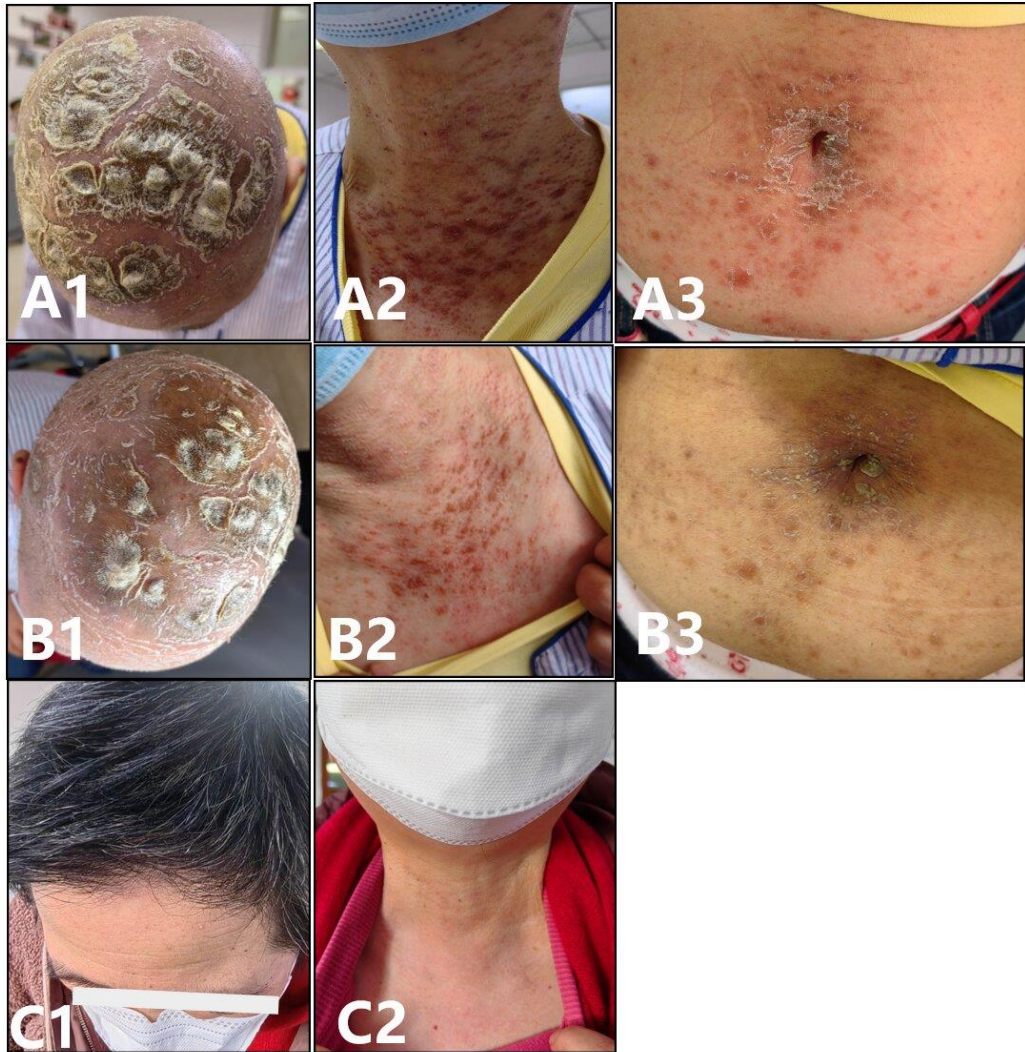

Supplementary Figure 2. Serial Changes in Skin Lesions Following Treatment for irAE Dermatitis. This figure illustrates the clinical progression of dermatitis in a representative patient. Panels A1-A3 show the characteristic skin lesions at the initial onset of the irAE. Panels B1-B3 depict the progressive improvement of these lesions during active treatment. Panels C1-C2 demonstrate the complete resolution of the skin lesions upon successful completion of therapy.

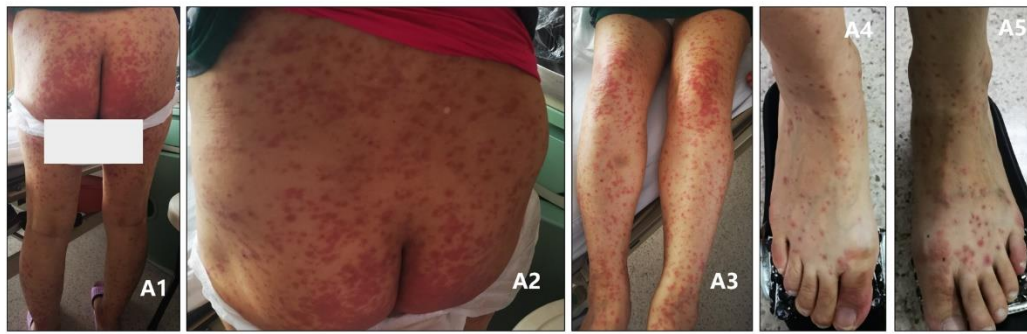

Supplementary Figure 3. Skin Lesions in a Patient with irAE-Induced Dermatitis During Immunotherapy. This figure series depicts the cutaneous manifestations at disease onset in a representative patient. Panels A1-A2 show the characteristic rash located on the buttocks and lower back. Panel A3 demonstrates the appearance of the rash on the leg. Panels A4-A5 present the rash affecting both feet.

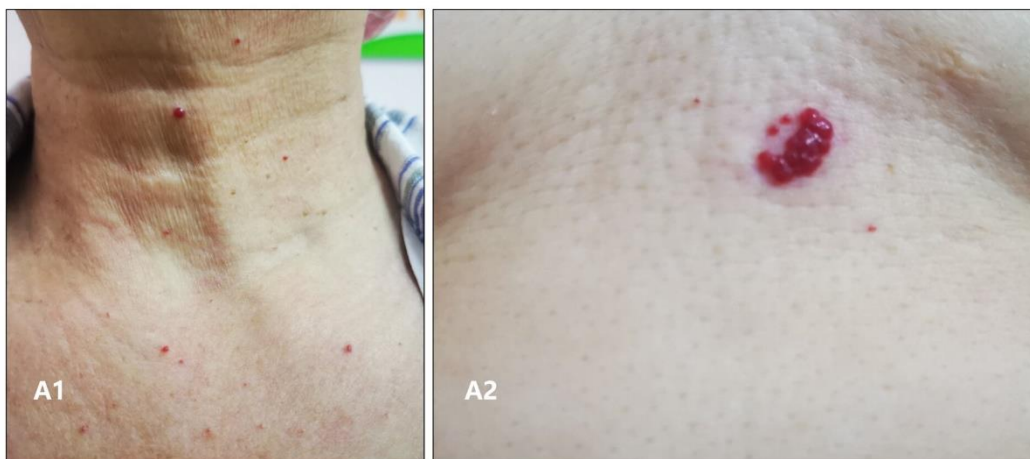

Supplementary Figure 4. Skin Lesions in a Patient with Cutaneous Capillary Hyperplasia as an irAE During Immunotherapy. This figure depicts the cutaneous manifestations at disease onset in a representative patient. Panels A1-A2 show the characteristic skin lesions located on the neck and chest.

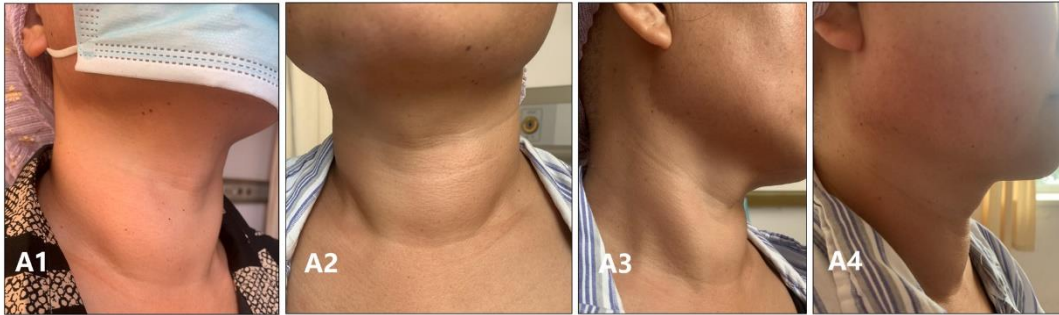

Supplementary Figure 5. Evolution of Neck Swelling in Patients with Thyroiditis as an irAE During Immunotherapy. Serial imaging documents the progressive improvement of thyroid enlargement in a representative patient. Panels A1-A4 illustrate the resolution of the neck swelling over the treatment course.

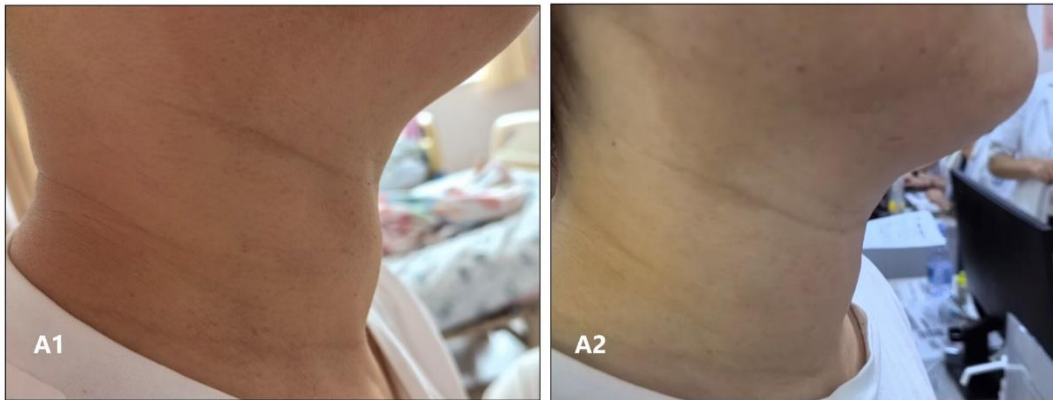

Supplementary Figure 6. Resolution of Thyroiditis-Associated Neck Swelling in a Second Patient. Serial imaging documents the progressive improvement of thyroid enlargement in a representative patient. Panels A1-A2 illustrate the resolution of the neck swelling over the treatment course.
